# Supplementary material for: Cell Cycle Stage and DNA Repair Pathway Influence CRISPR/Cas9 Gene Editing Efficiency in Porcine Embryos
Source: MDPI journal article supplement (doi:10.3390/life12020171), 2022-01-25
Supplement: s1 [file s1]

Article

# Cell cycle stage and DNA repair pathway influence CRISPR/Cas9 gene editing efficiency in porcine embryos

Karina Gutierrez<sup>1</sup>, Werner G. Glanzner<sup>1</sup>, Mariana P. de Macedo<sup>1</sup>, Vitor B. Rissi<sup>2</sup>, Naomi Dicks<sup>1</sup>, Rodrigo C. Bohrer<sup>1</sup>, Hernan Baldassarre<sup>1</sup>, Luis B. Agellon<sup>3,\*</sup> and Vilceu Bordignon<sup>1,\*</sup>

## Supplementary material

**Table S1.** Primers used for sgRNA synthesis.

| Name         | Sequence of the forward primers   |
|--------------|-----------------------------------|
| XBP1_sgRNA1  | (T7) GCTTGGTGTAGACCATTCGT (px330) |
| XBP1_sgRNA2  | (T7) CCCAGCTGATTAGTGTCTA (px330)  |
| FABP3_sgRNA1 | (T7) GCTGGGATTGAGGGACAGGA (px330) |
| FABP3_sgRNA2 | (T7) GGAACTCATCCTGGTAAGA (px330)  |
| FABP6_sgRNA1 | (T7) ACTCTCGATCTCATACTTGC (px330) |
| FABP6_sgRNA2 | (T7) CGATGAGTTCATGAAGCGCT (px330) |

(T7) corresponds to TAATACGACTCACTATAGG. (px330) corresponds to GTTTAGAGCTAGAAATAGC. The sequence of the reverse primer used for all forward primers is: AAAAGCACCGACTCGGTGCC.

**Table S2.** Primers used for genomic DNA amplification.

| Gene         | Sense                | Antisense            | Amplicon |
|--------------|----------------------|----------------------|----------|
| <i>XBP1</i>  | GAGAGCCAAGCTAATGTGGT | TGTCCAGTGACCCTTACCCA | 602 bp   |
| <i>FABP3</i> | AGCTGGGCTGTCTGACTCTA | TCCACCCTCCACTATCCAG  | 472 bp   |
| <i>FABP6</i> | AATGGGATTCCAGCCAGCAA | TCGCAGCAGTAACATTGGGT | 521 bp   |



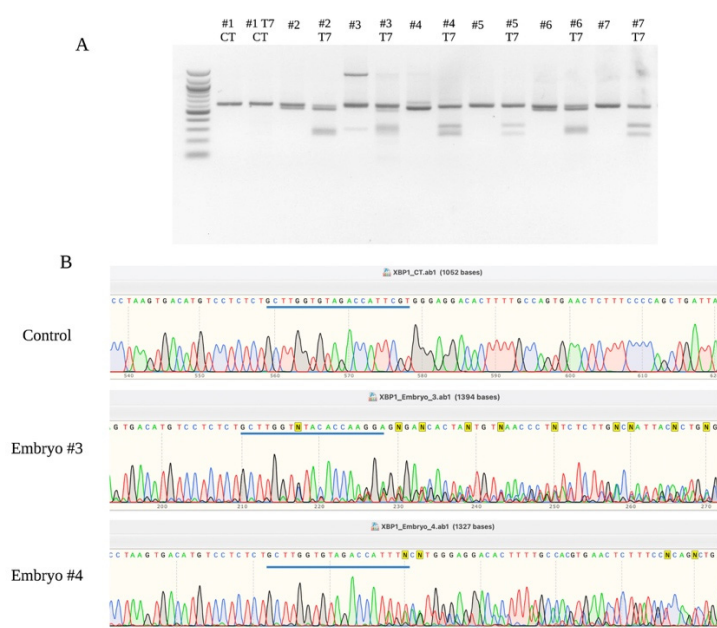

**Figure S1.** Genome editing analysis. **(A)** Agarose gel resolution before and after T7 Endonuclease I assay. Different pattern of bands is visible in the gel according to the induced mutations. **(B)** Direct Sanger Sequencing from three embryos: one control and two embryos where errors are visible in the chromatogram in the sgRNA position (blue line). This figure was assembled using BioRender.
